# Supplementary material for: Insights From Twitter Conversations on Lupus and Reproductive Health: Protocol for a Content Analysis
Source: PubMed Central journal article supplement (PMC7481870; doi:10.2196/15623), 2020-08-26
Supplement: resprot_v9i8e15623_app2.pdf [file resprot_v9i8e15623_app2.pdf]

**Multimedia Appendix 2. Code categories to identify main themes in Twitter posts about lupus and reproductive health.**

| Code category        | A priori codes/variables and definitions (data dictionary code value)                                                                                                                                                                                                                                                                                                                                                                                                                                                                                                                                                                                  | Emergent codes/variables and definitions (code value) |
|----------------------|--------------------------------------------------------------------------------------------------------------------------------------------------------------------------------------------------------------------------------------------------------------------------------------------------------------------------------------------------------------------------------------------------------------------------------------------------------------------------------------------------------------------------------------------------------------------------------------------------------------------------------------------------------|-------------------------------------------------------|
| Pregnancy planning   | <ul style="list-style-type: none"> <li>● Conception (defined as: trying to conceive)</li> <li>● Fertility (defined as: effect of lupus on conception and success of pregnancy, e.g., miscarriage)</li> <li>● Medication (defined as: medication lupus patients should or shouldn't take, stopping medication, safety, compatibility, unsafe medications, teratogenicity, side-effects in patients planning on becoming pregnant)</li> <li>● Indeterminate, or other topics related to pregnancy planning</li> </ul>                                                                                                                                    |                                                       |
| Pregnancy management | <ul style="list-style-type: none"> <li>● Monitoring (defined as: seeing/speaking with doctor, knowing what type of physician to consult)</li> <li>● Flares (defined as: mention of flares and remission in pregnancy)</li> <li>● Risks and complications (defined as: Pre-clampsia, Pre-term birth, Small-for-gestational-age neonates)</li> <li>● Medication (defined as: medication lupus patients should or shouldn't take, stopping medication, safety, compatibility, unsafe medications, teratogenicity, side-effects in patients who are already pregnant)</li> <li>● Indeterminate, or other topics related to pregnancy management</li> </ul> |                                                       |

|                                                      |                                                                                                                                                                                                                                                                     |  |
|------------------------------------------------------|---------------------------------------------------------------------------------------------------------------------------------------------------------------------------------------------------------------------------------------------------------------------|--|
| Delivery/Labor/Birth                                 | <ul style="list-style-type: none"> <li>• Pre-term birth</li> <li>• Cesarean section</li> <li>• Indeterminate, or other topics related to delivery/labor/birth</li> </ul>                                                                                            |  |
| Pregnancy prevention                                 | <ul style="list-style-type: none"> <li>• Contraception</li> <li>• Planned parenthood</li> <li>• Indeterminate, or other topics related to pregnancy prevention</li> </ul>                                                                                           |  |
| Pregnancy termination                                | <ul style="list-style-type: none"> <li>• Elective abortion</li> <li>• Spontaneous abortion/miscarriage</li> <li>• Stillbirth</li> <li>• Indeterminate, or other topics related to pregnancy termination</li> </ul>                                                  |  |
| Male partners of women with lupus                    | <ul style="list-style-type: none"> <li>• Birth control options</li> <li>• Family planning</li> <li>• Indeterminate, or other topics related to male partners of women with lupus</li> </ul>                                                                         |  |
| Male SLE patients regarding pregnancy and fatherhood | <ul style="list-style-type: none"> <li>• Birth control</li> <li>• Fertility</li> <li>• Medication during conception</li> <li>• Adverse fetal outcomes</li> <li>• Passing on lupus</li> <li>• Indeterminate, or other topics related to male SLE patients</li> </ul> |  |
