# Supplementary material for: Insights From Twitter Conversations on Lupus and Reproductive Health: Protocol for a Content Analysis
Source: PubMed Central journal article supplement (PMC7481870; doi:10.2196/15623), 2020-08-26
Supplement: resprot_v9i8e15623_app3.pdf [file resprot_v9i8e15623_app3.pdf]

**Table 3. Code categories to classify Twitter users.**

| Code category     | A priori codes/variables and definitions (data dictionary code value)                                                                                                                          | Emergent codes/variables and definitions (code value) |
|-------------------|------------------------------------------------------------------------------------------------------------------------------------------------------------------------------------------------|-------------------------------------------------------|
| <b>SLE Status</b> | <ul style="list-style-type: none"> <li>● Patient with lupus</li> <li>● Partner of patient with lupus</li> <li>● Healthcare professional</li> <li>● Other or could not be determined</li> </ul> |                                                       |
| <b>Sex</b>        | <ul style="list-style-type: none"> <li>● Female</li> <li>● Male</li> <li>● Transgender</li> <li>● Could not be determined</li> </ul>                                                           |                                                       |
| <b>Race</b>       | <ul style="list-style-type: none"> <li>● White or Caucasian</li> <li>● Person of color</li> <li>● Could not be determined</li> </ul>                                                           |                                                       |
