# Supplementary material for: Insights From Twitter Conversations on Lupus and Reproductive Health: Protocol for a Content Analysis
Source: PubMed Central journal article supplement (PMC7481870; doi:10.2196/15623), 2020-08-26

Multimedia Appendix 5. Data extraction and cleaning flow diagram.

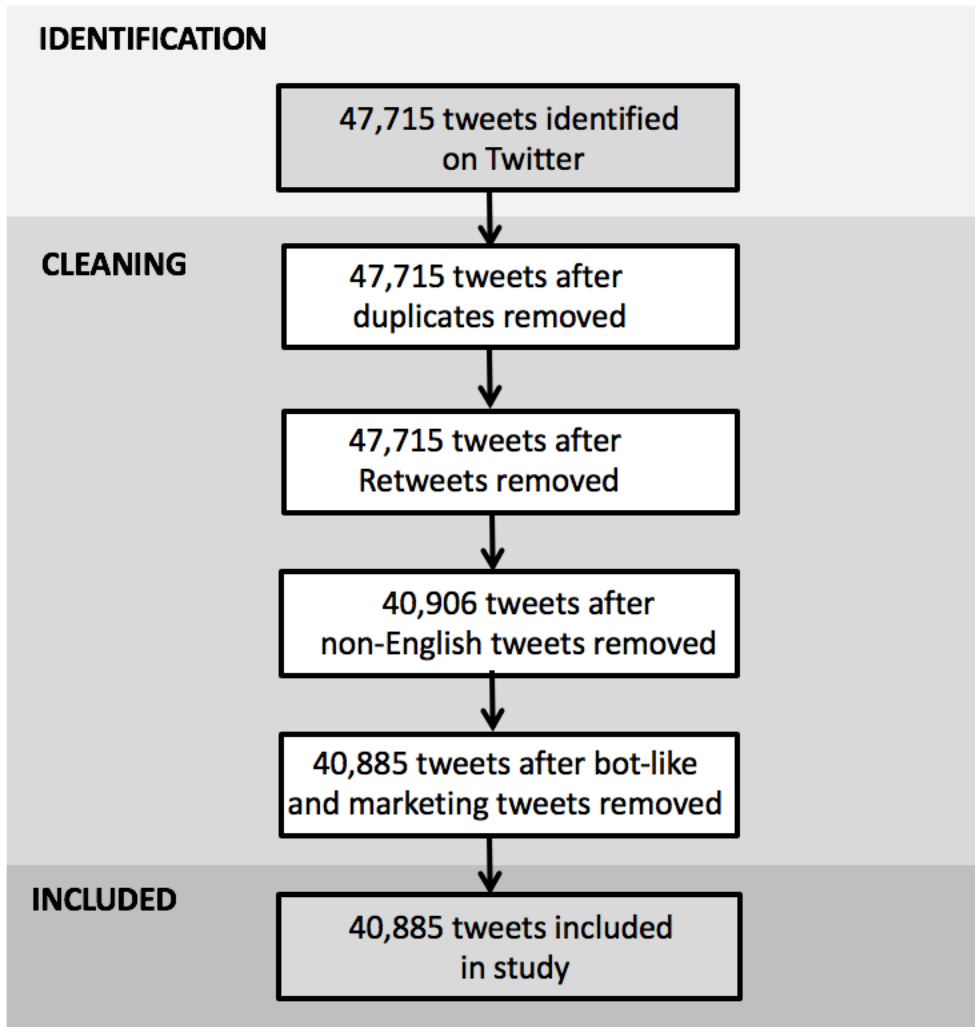

Supplement: resprot_v9i8e15623_app5.pdf [file resprot_v9i8e15623_app5.pdf]
